# Supplementary material for: Enhanced reversibility and electrochemical window of Zn-ion batteries with an acetonitrile/water-in-salt electrolyte
Source: Royal Society of Chemistry journal article supplement (doi:10.1039/d0cc06076c), 2021-01-01
Supplement: d0cc06076c1.pdf [file d0cc06076c1.pdf]

## Electronic Supplementary Information (ESI)

### Enhanced Reversibility and Electrochemical Window of Zn-ion Batteries with Acetonitrile/Water-in-Salt Electrolytes

Xueyang Song,<sup>a,#</sup> Huibing He,<sup>a,#</sup> Mohammad Hossein Aboonasr Shiraz,<sup>a</sup> Hongzheng Zhu,<sup>a</sup> Ali Khosrozadeh<sup>a</sup> and Jian Liu<sup>a\*</sup>

<sup>a</sup> School of Engineering, Faculty of Applied Science, The University of British Columbia, Kelowna, BC V1V 1V7 Canada

\* Corresponding author's email: [Jian.liu@ubc.ca](mailto:Jian.liu@ubc.ca) (J. Liu).

# These authors contributed equally.

## Experimental Section

### 1. Materials preparation

$\delta$ -MnO<sub>2</sub> was synthesized using a hydrothermal method. Briefly, 6 mmol KMnO<sub>4</sub> and 1 mmol MnSO<sub>4</sub>·H<sub>2</sub>O were dissolved into 70 mL distilled water. After stirring, the solution was transferred into a 100 mL Teflon contained autoclave and heated at 180 °C for 12 hours. When the autoclave cooled down to room temperature, the PH was adjusted to 7, and the powder sample was filtered and collected. Next, the powder was dried at 100 °C overnight. The aqueous electrolyte was 15 M (molality, mol kg<sup>-1</sup>) zinc trifluoromethanesulfonate (Zn(CF<sub>3</sub>SO<sub>3</sub>)<sub>2</sub>) system. The acetonitrile/water-in-salt (AWIS) hybrid electrolytes were prepared by adding acetonitrile (AN) in the aqueous electrolyte with different H<sub>2</sub>O/AN volume ratios (2:1, 1:1, and 1:2), which was named as H<sub>2</sub>O/AN-1, H<sub>2</sub>O/AN-2, and H<sub>2</sub>O/AN-3, respectively (Table SI-1). H<sub>2</sub>O/AN ratio in the AWIS hybrid electrolyte was optimized in the Zn|Zn symmetric cells, of which the cycling stability was shown in Figure S1. It can be found that H<sub>2</sub>O/AN-3 with an H<sub>2</sub>O/AN volume ratio of 1:1 exhibited the smallest overpotential and the most extended lifespan. Therefore, H<sub>2</sub>O/AN-3 was used for further investigation and referred to as the hybrid electrolyte.

**Table SI-1.** The composition and PH of different electrolytes investigated in this work.

| Electrolyte           | Zn(CF <sub>3</sub> SO <sub>3</sub> ) <sub>2</sub> (g) | H <sub>2</sub> O (ml) | AN (ml) | PH   |
|-----------------------|-------------------------------------------------------|-----------------------|---------|------|
| Aqueous electrolyte   | 32.7                                                  | 6                     | 0       | 6.68 |
| H <sub>2</sub> O/AN-1 | 32.7                                                  | 4                     | 2       | -    |
| H <sub>2</sub> O/AN-2 | 32.7                                                  | 2                     | 4       | -    |
| H <sub>2</sub> O/AN-3 | 32.7                                                  | 3                     | 3       | 6.75 |

## 2. Structural characterizations

The crystal structure of the Zn foils before and after cycling was examined by Powder X-ray diffraction (XRD, Bruker D8-Advance X-ray diffractometer) using Cu K $\alpha$  radiation (1.54056 Å). The morphology was observed by using a scanning electron microscope (SEM, Tescan MIRA3 FE-SEM). The electrolytes were characterized by using an inVia Raman Microscope coupled with a 785 nm diode laser (Renishaw).

## 3. Electrochemical measurements

As the active material,  $\delta$ -MnO<sub>2</sub> was mixed with carbon nanotube-PVDF-NMP blend (LB107-54, Cnano Technology), and the weight ratio of active material, carbon nanotube, and PVDF is 7:2:1. Subsequently, the slurry was pasted on a titanium foil and dried in a vacuum oven at 60 °C overnight. Next, the as-prepared electrode was cut into 12 mm round plates. The mass loading of MnO<sub>2</sub> was around 1 mg on each disk. Galvanostatic charge/discharge test was carried out on a Neware BTS 4000 battery tester. The galvanostatic charge-discharge measurement of Zn-MnO<sub>2</sub> was performed at 0.1C (1C = 300 mA g<sup>-1</sup>, based on MnO<sub>2</sub>) within a voltage range of 0.8-1.8V, 0.8-2.0V, and 0.8-2.2V. Electrochemical impedance spectroscopy (EIS) measurement was conducted on Biologic SP-150 Potentiostat/Galvanostat Station in a frequency range of 200 kHz to 0.01 Hz with a voltage amplitude of 5 mV.

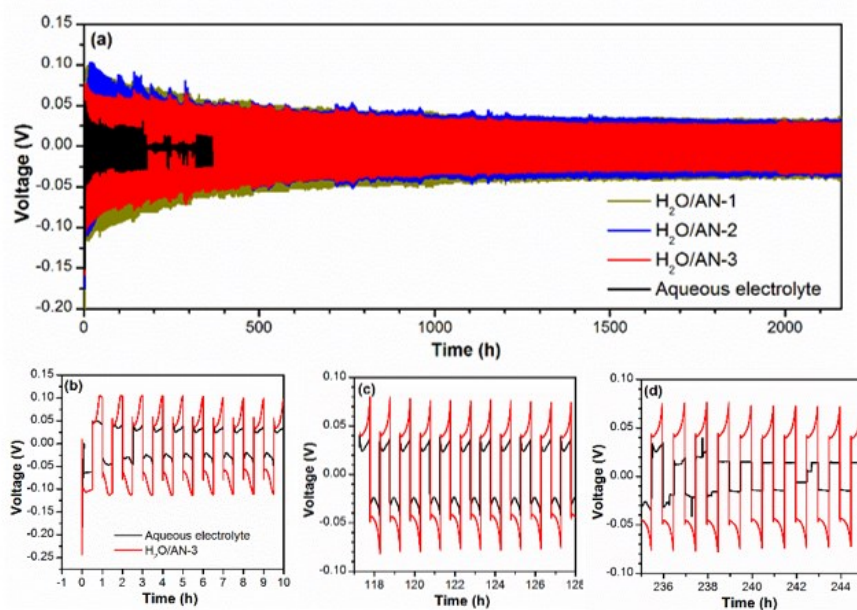

**Figure S1.** (a) Effect of different electrolytes on the cycling stability of Zn|Zn symmetric cells measured at a current density of 1 mA cm<sup>-2</sup> with a constant capacity of 1mAh cm<sup>-2</sup>; (b-d) comparison of charge/discharge profiles of aqueous electrolyte with H<sub>2</sub>O/AN-3 (hybrid electrolyte) at different times.

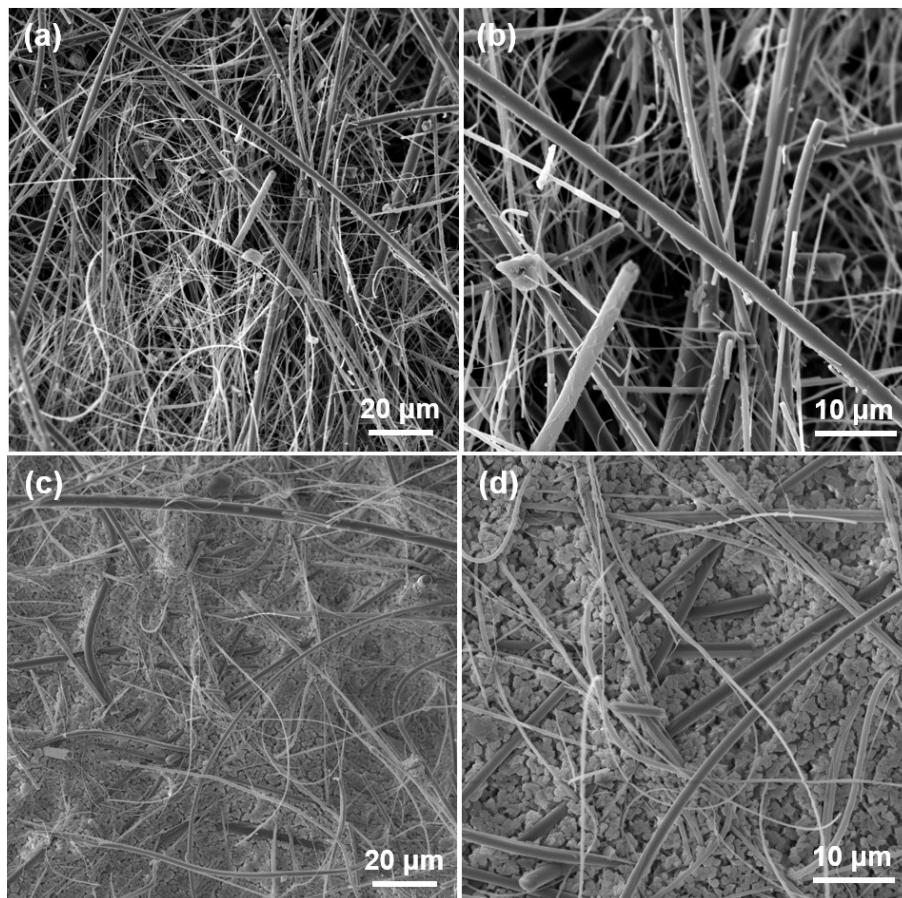

**Figure S2.** SEM images of the glass-fiber separators recovered from the Zn-Zn symmetric cells with (a, b) the hybrid electrolyte (H<sub>2</sub>O/AN-3) and (c, d) the aqueous electrolyte.

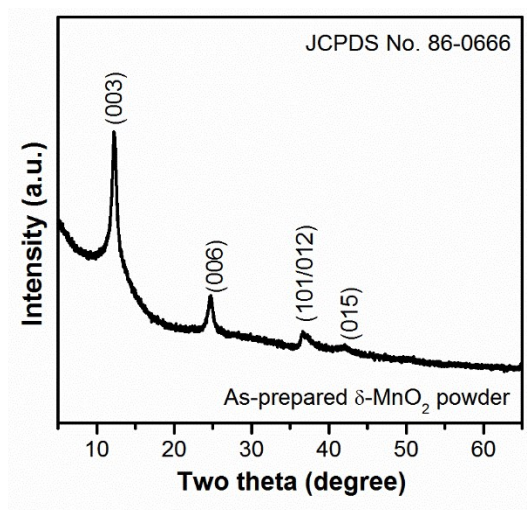

**Figure S3.** XRD pattern of the δ-MnO<sub>2</sub> powder.

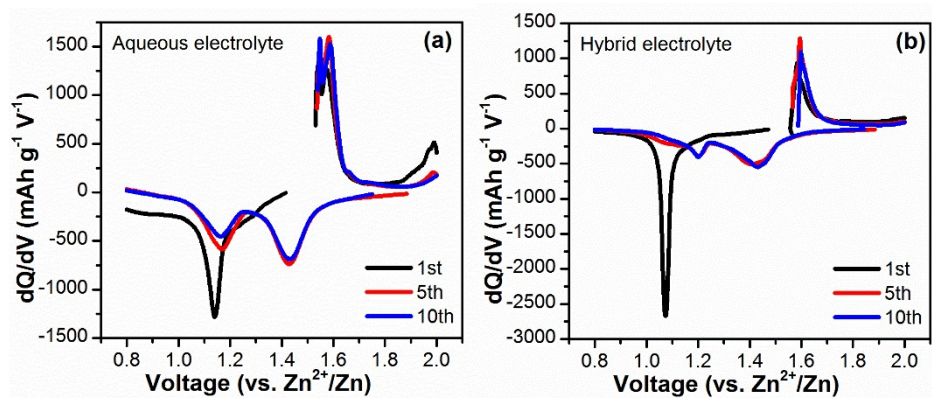

**Figure S4.** dQ/dV curves of Zn-MnO<sub>2</sub> cells with the (a) aqueous electrolyte and (b) hybrid electrolyte in the 1<sup>st</sup>, 5<sup>th</sup>, and 10<sup>th</sup> cycles (0.8-2.2V).

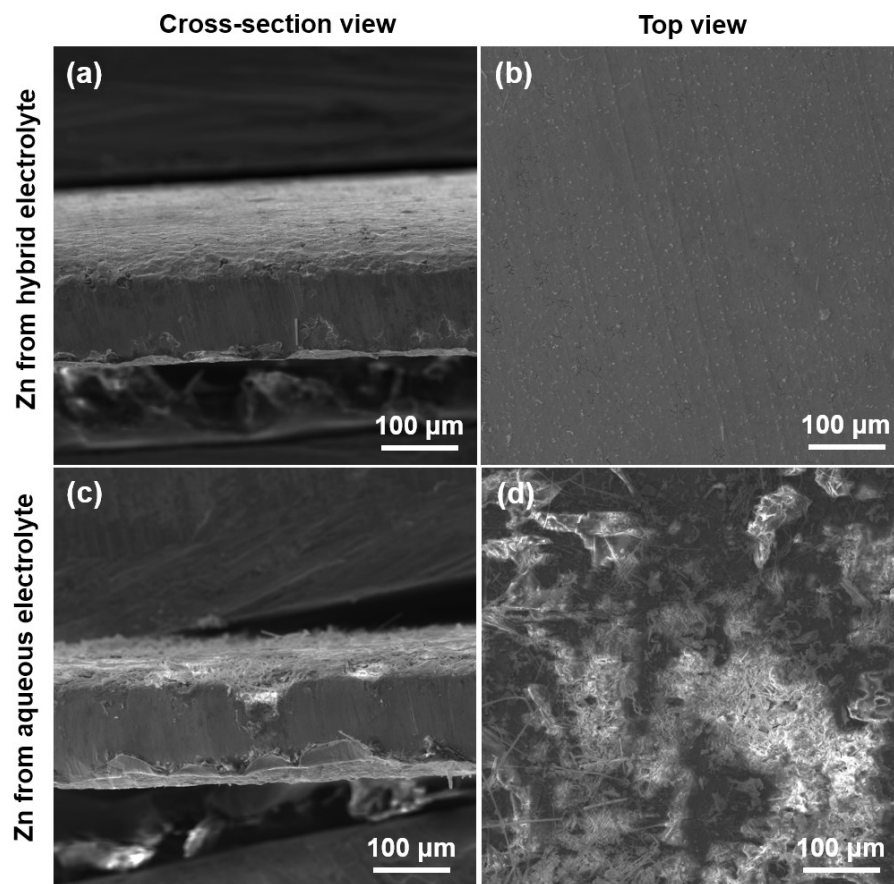

**Figure S5.** SEM images of Zn metal anodes recovered Zn-MnO<sub>2</sub> cells with the (a, b) hybrid electrolyte and (c, d) aqueous electrolyte after cycling (0.8-2.2 V).

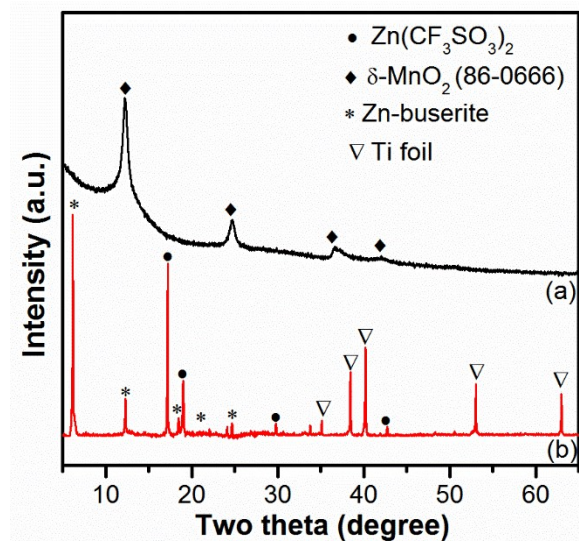

**Figure S6.** XRD patterns of (a) the as-prepared  $\text{MnO}_2$  powder and (b) the  $\text{MnO}_2$  electrode at the discharge state in the hybrid electrolyte (0.8-2.0V). (Zn-buserite is indexed according to Nat. Commun., 2017, 8, 405).

**Table SI-2.** EIS parameters obtained by fitting the data with the equivalent circuit in Figure 1b.

| Sample              | $R_0$ ( $\Omega$ ) | $R_{\text{SEI}}$ ( $\Omega$ ) | $R_{\text{CT}}$ ( $\Omega$ ) |
|---------------------|--------------------|-------------------------------|------------------------------|
| Hybrid electrolyte  | 17.8               | 10.0                          | 135.2                        |
| Aqueous electrolyte | 0.2                | 12.0                          | 236.0                        |
